# Supplementary material for: Non-alcoholic fatty liver disease increases the risk of biochemical recurrence in high-grade metastatic prostate cancer patients
Source: Research Square preprint supplement (doi:10.21203/rs.3.rs-141125/v1), 2021-01-08
Supplement: Supplementary file 1 [file 37f72f185af3d7b86e6012ed.docx]

**Table S1. Relationship between clinical variables and NAFLD**

|  | NAFLD | No NAFLD | *p* |
| --- | --- | --- | --- |
| Age (years) | 70.1 ± 6.2 | 71.0 ± 6.3 | 0.35 |
| PSA (ng/ml) | 63.9 ± 28.4 | 63.9 ± 22.9 | 0.99 |
| Weight (kg) | 78.2 ± 5.0 | 74.8 ± 4.9 | <0.001 |
| SAT (cm3) | 356.8 ± 49.2 | 319.2 ± 57.3 | <0.001 |
| VAT (cm3) | 327.4 ± 50.3 | 292.0 ± 57.0 | <0.001 |
| Hyperlipidaemia (n (%)) | 175 (93.1) | 88 (21.3) | <0.001 |
| Triglyceride (mmol/L) | 2.0 ± 0.7 | 1.4 ± 0.5 | <0.001 |
| Total cholesterol (mmol/L) | 5.0 ± 1.2 | 4.8 ± 1.5 | 0.11 |
| LDL cholesterol (mmol/L) | 3.4 ± 0.9 | 3.2 ± 1.2 | 0.11 |
| HDL cholesterol (mmol/L) | 1.1 ± 0.4 | 1.3 ± 0.3 | <0.001 |
| Baseline testosterone (ng/dL) | 265.4 ± 30.5 | 261.8 ± 34.2 | 0.56 |
| Fasting glucose (mmol/L) | 6.9±1.8 | 6.0±1.3 | <0.001 |
| Gleason score (n (%)) |  |  |  |
| ≥4+3 | 119 (63.3) | 180 (43.5) | <0.001 |
| ≤3+4 | 69 (36.7) | 234 (56.5) |  |
| BMI category (n (%)) |  |  |  |
| <25 (kg/m2) | 32 (17.0) | 187 (45.2) | <0.001 |
| 25–29.9 (kg/m2) | 104 (55.3) | 202 (48.8) |  |
| >29.9 (kg/m2) | 52 (27.7) | 25 (6.0) |  |
| Hypertension |  |  |  |
| Yes | 89 (45.9) | 105 (54.1) | <0.001 |
| No | 99 (24.3) | 309 (75.7) |  |
| Diabetes mellitus |  |  |  |
| Yes | 59 (50.4) | 58 (49.6) | <0.001 |
| No | 129 (26.6) | 356 (73.4) |  |

Abbreviations: PSA, prostate-specific antigen; SAT, subcutaneous adipose tissue; VAT, visceral adipose tissue; LDL, low-density lipoprotein; HDL, high-density lipoprotein; BMI, body mass index; NAFLD, non-alcoholic fatty liver disease.

**Table S2. Cox proportional hazard regression analysis for predicting the probability of BCR in patients with Gleason score≤3+4 after ADT#**

|  | HR | 95% CI | *p* |
| --- | --- | --- | --- |
| *Model 1* |  |  |  |
| BMI | 1.27 | 0.83-1.95 | 0.27 |
| NAFLD | 1.01 | 0.74-1.37 | 0.98 |
| *Model 2* |  |  |  |
| VAT | 1.15 | 0.90-1.45 | 0.26 |
| NAFLD | 0.95 | 0.71-1.26 | 0.72 |
| *Model 3* |  |  |  |
| hypertension | 0.98 | 0.77-1.26 | 0.90 |
| NAFLD | 0.91 | 0.69-1.19 | 0.49 |
| *Model 4* |  |  |  |
| Diabetes mellitus | 1.40 | 0.92-1.90 | 0.12 |
| NAFLD | 0.90 | 0.69-1.19 | 0.45 |

**#** Adjusted for age and PSA level.
